# Supplementary material
Source: HighWire-hosted journal article supplement (https://bmjopen.bmj.com/content/11/8/e047264)
Supplement: inline-supplementary-material-1 [file inline-supplementary-material-1.pdf]

## Multivariate logistic regression models

Model 1

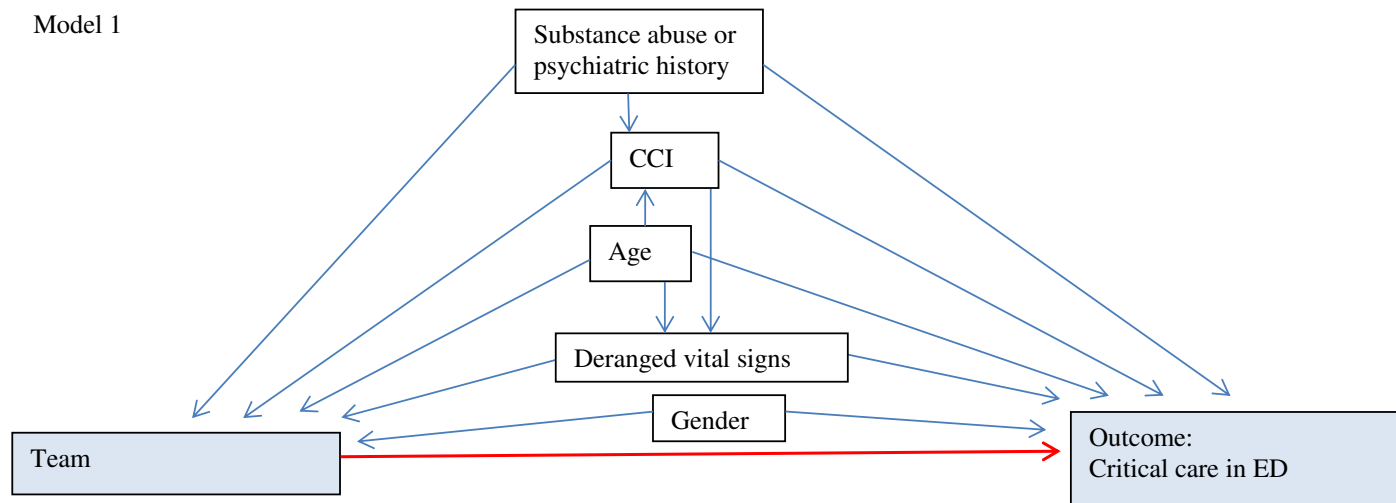

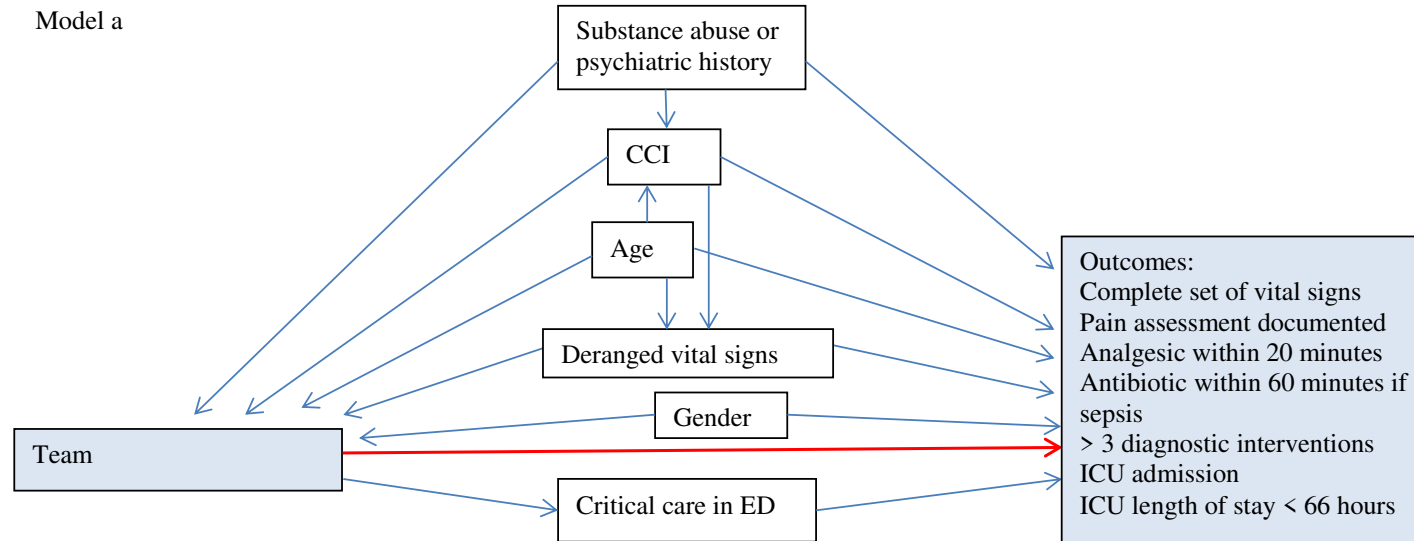

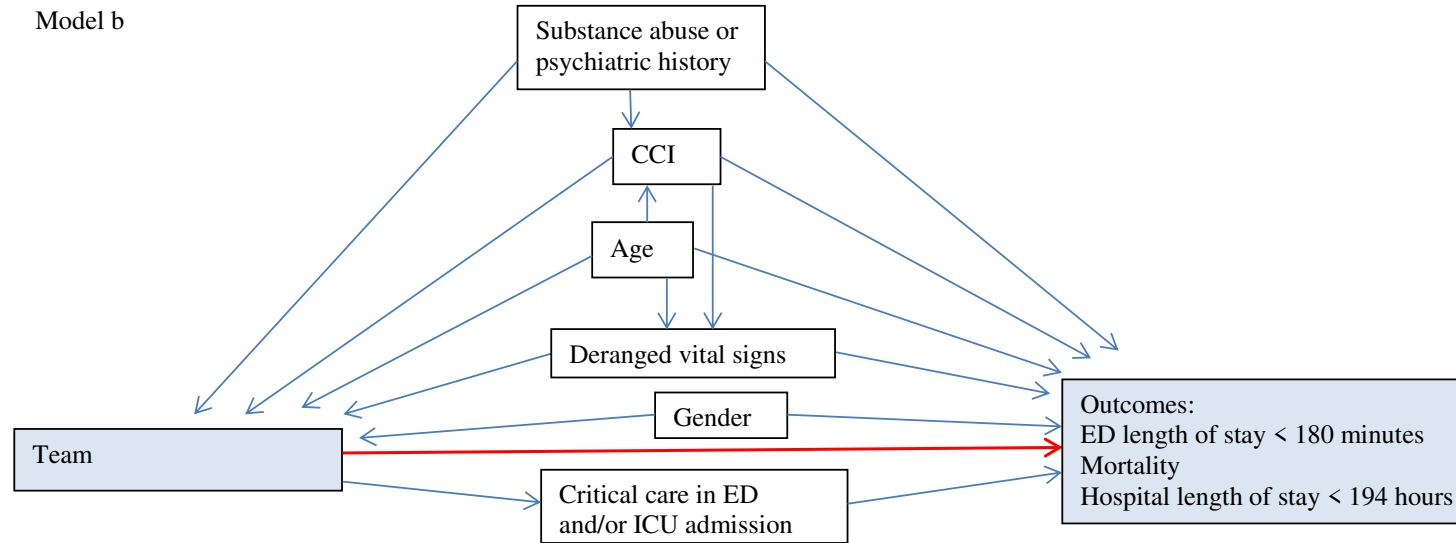

Legend: Red arrow: timeline from management at arrival to outcome (blue boxes). White boxes: Factors potentially influencing management or outcome. Blue arrows: direction of influence.
